# Supplementary material for: A dual role of BRCA1 in two distinct homologous recombination mediated repair in response to replication arrest
Source: PubMed Central journal article supplement — Nucleic Acids Res. 2011 Sep 27;40(2):726–38. doi: 10.1093/nar/gkr748 (PMC3258139; doi:10.1093/nar/gkr748), 2011-09-27
Supplement: supp_gkr748_gkr748_updated_Supplementary.pdf [file supp_gkr748_gkr748_updated_Supplementary.pdf]

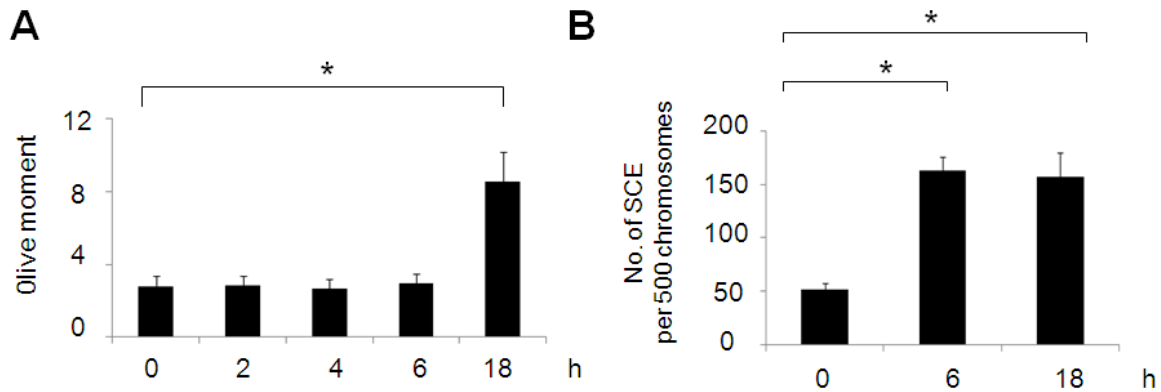

**Fig.S1 SCE occurs following stalled or collapsed DNA replication forks in MDA-MB-231 cells.** (A) The Comet assay was conducted in MDA-MB-231 cells treated with 2 mM HU at indicated time points. At least 150 cells were analyzed for each treatment. Results were expressed by the Olive moment.  $p$  values were calculated by Student's  $t$  test (\*  $p < 0.05$ ). The data shown is from three independent experiments with standard errors. (B) The frequencies of SCE in MDA-MB-231 cells with or without HU treatment at indicated time points. The mitotic cells were prepared according to a standard procedure (see materials and methods). Histograms show the frequency of SCE per 500 chromosomes with at least 20-40 metaphase cells being counted. The data shown is the result from three independent experiments.

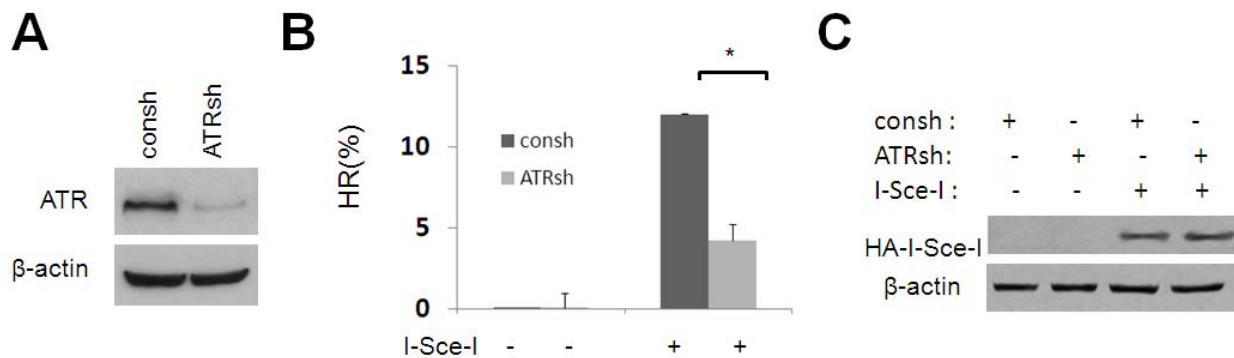

**Fig. S2 ATR-deficient cells show a significant reduction in HR mediated by short tract gene conversion in H1299 cells.** (A) ATR knockdown by ATRsh. Lysates were prepared from H1299 cells after 72-h infection with ATRsh or consh. (B) The induction of HR by overexpression of I-Sce-I was measured by dual-color flow cytometric detection of GFP-positive cells. H1299/DR-GFP cells were infected with consh or ATRsh, then subsequently treated with and without infection of the adenoviral I-Sce-I expression construct (Ad-Scel-NG). The HR frequencies in cells depleted of ATR are shown in comparison to cells with intact ATR expression. Results are means from three independent experiments, with standard errors shown (\*  $p < 0.01$ ). (C) The expression of HA-tagged I-Sce-I endonuclease was monitored by Western blot using anti-HA antibody. H1299/DR-GFP cells with or without ATR depletion were infected with and without Ad-Scel-NG, and whole cell lysate was prepared at 48-h following Ad-Scel-NG infections.

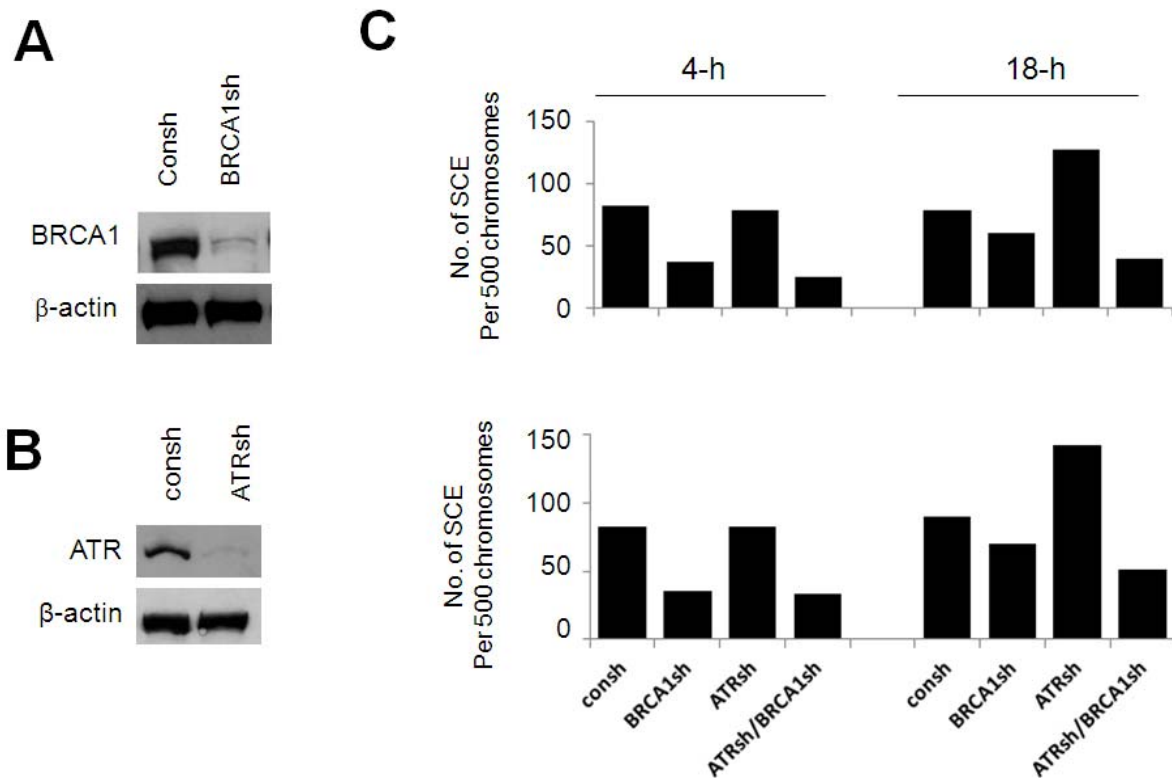

**Fig.S3. The role of BRCA1 in promotion of SCE following replication fork collapse is enhanced by ATR depletion in MDA-MB-231 cells. (A)** BRCA1 knockdown via BRCA1sh in MDA-MB-231 cells. **(B)** ATR knockdown via shRNA targeting ATR (ATRsh) in MDA-MB-231 cells. **(C)** BRCA1 knockdown led to a decreased frequency of SCE induced by 4-h HU treatment, which is independent of ATR. In contrast, BRCA1 knockdown led to a more profound decrease in frequency of SCE induced by 18-h HU treatment in cells depleted of ATR compared to cells with intact ATR expression. The experimental procedure is similar to that described in **Fig.3**. Histograms show the frequencies of SCE per 500 chromosomes with at least 20-40 metaphase cells being counted. The data shown is the result from two independent experiments.

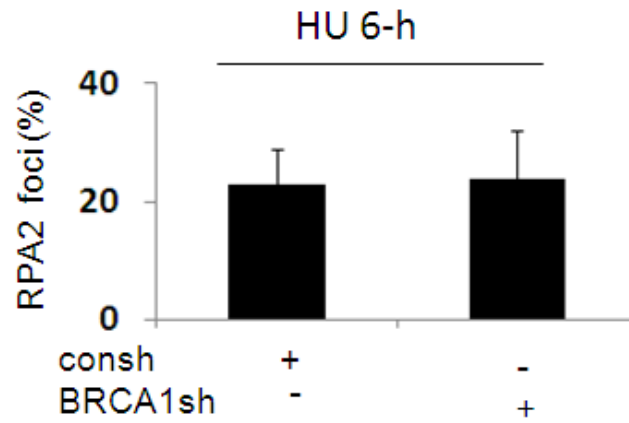

**Fig. S4. BRCA1 depletion has no effect on RPA2 foci following replication fork stalling.** RPA2 foci induced by 6-h HU treatment in MCF7 cells with or without BRCA1 depletion. Cells were scored positive when 10 nuclear foci were visible. Results are means from three independent experiments, with standard errors shown ( $p > 0.05$ ).  $p$  values were calculated by Student's  $t$  test.

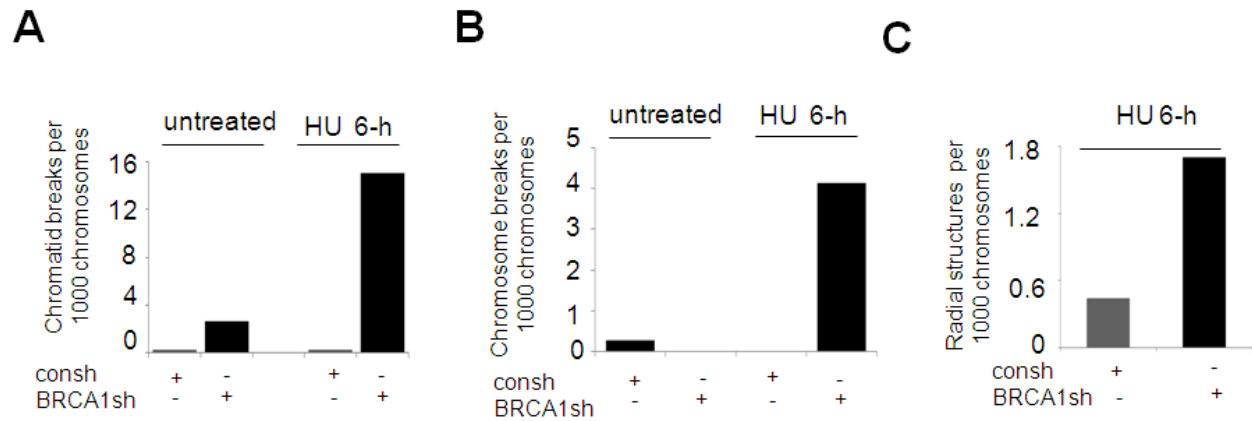

**Fig. S5 BRCA1 knockdown leads to increased frequencies of chromosomes aberrations following replication fork stalling. (A–C)** Frequencies of chromatid breaks (A) and chromosome breaks (B) and radial structure (C) in MCF7 cells. 40-50 metaphases for each sample were analyzed. The data shown is from one of two independent experiments.
